# Supplementary material for: Electrochemical intercalations of divalent ions inside Ni/Zn co-doped cobalt sulfide nanoparticle decorated carbon spheres with superior capacity
Source: Royal Society of Chemistry journal article supplement (doi:10.1039/d0nr02761h), 2020-01-01
Supplement: d0nr02761h1.pdf [file d0nr02761h1.pdf]

## Supporting Information

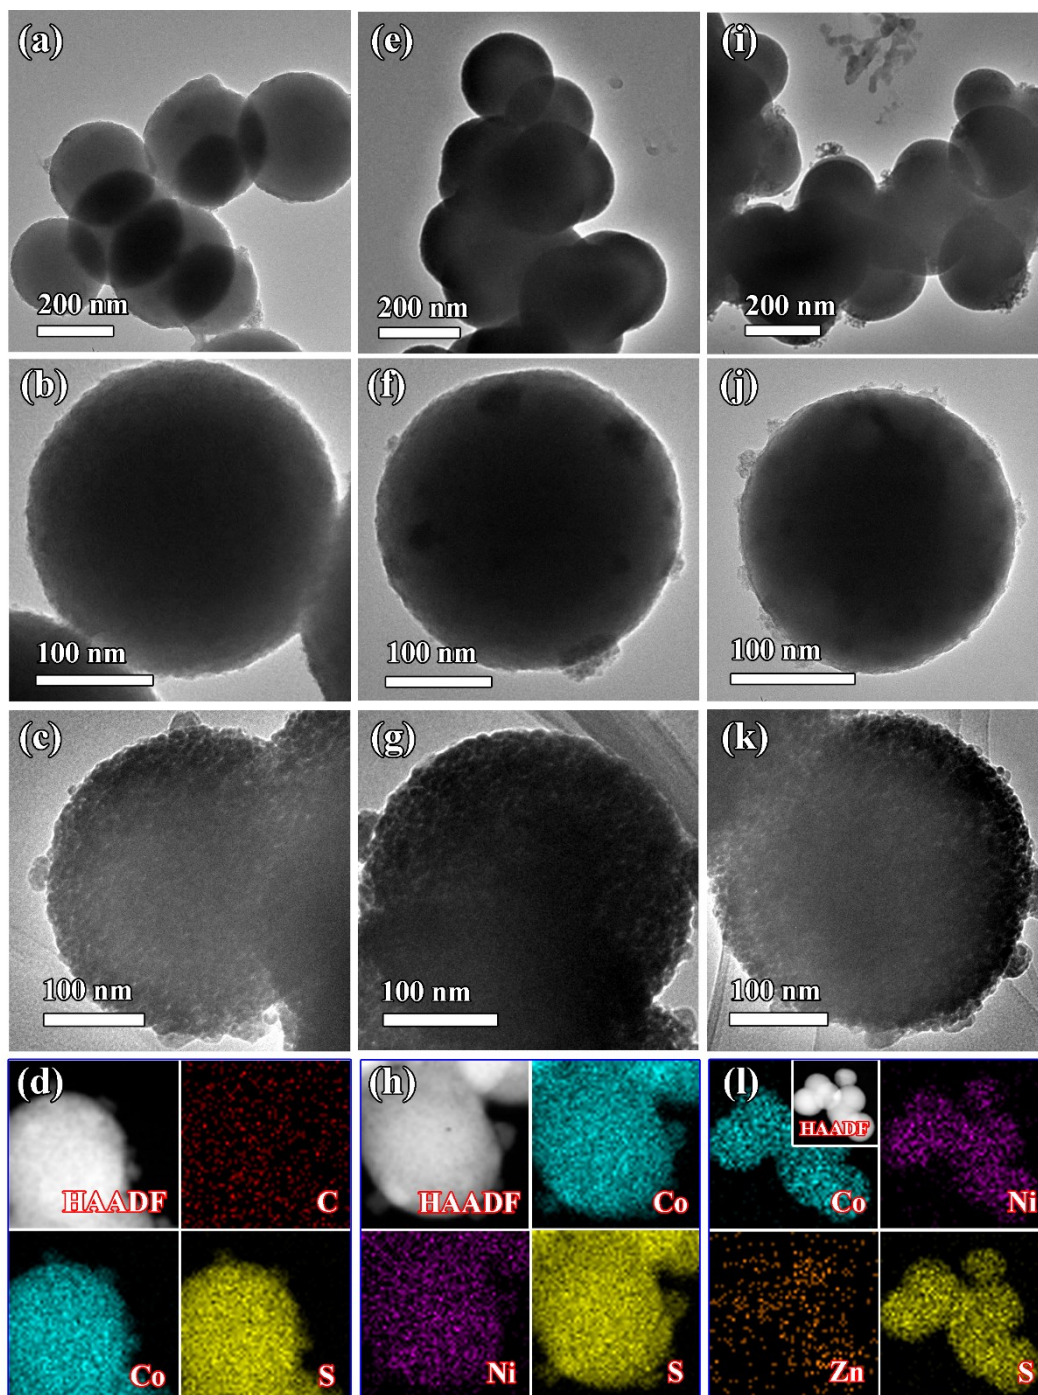

Figure S1 TEM images and corresponding STEM/EDS mapping of (a, b, c, d) CoS<sub>2</sub>@C, (e, f, g, h) Ni-CoS<sub>2</sub>@C, and (i, j, k) Zn-CoS<sub>2</sub>@C spheres. (c, g, k) are TEM images of annealed samples, (l) represent STEM/EDS elemental mapping of Ni/Zn-CoS<sub>2</sub>@C spheres confirming low concentration of elemental Zn.

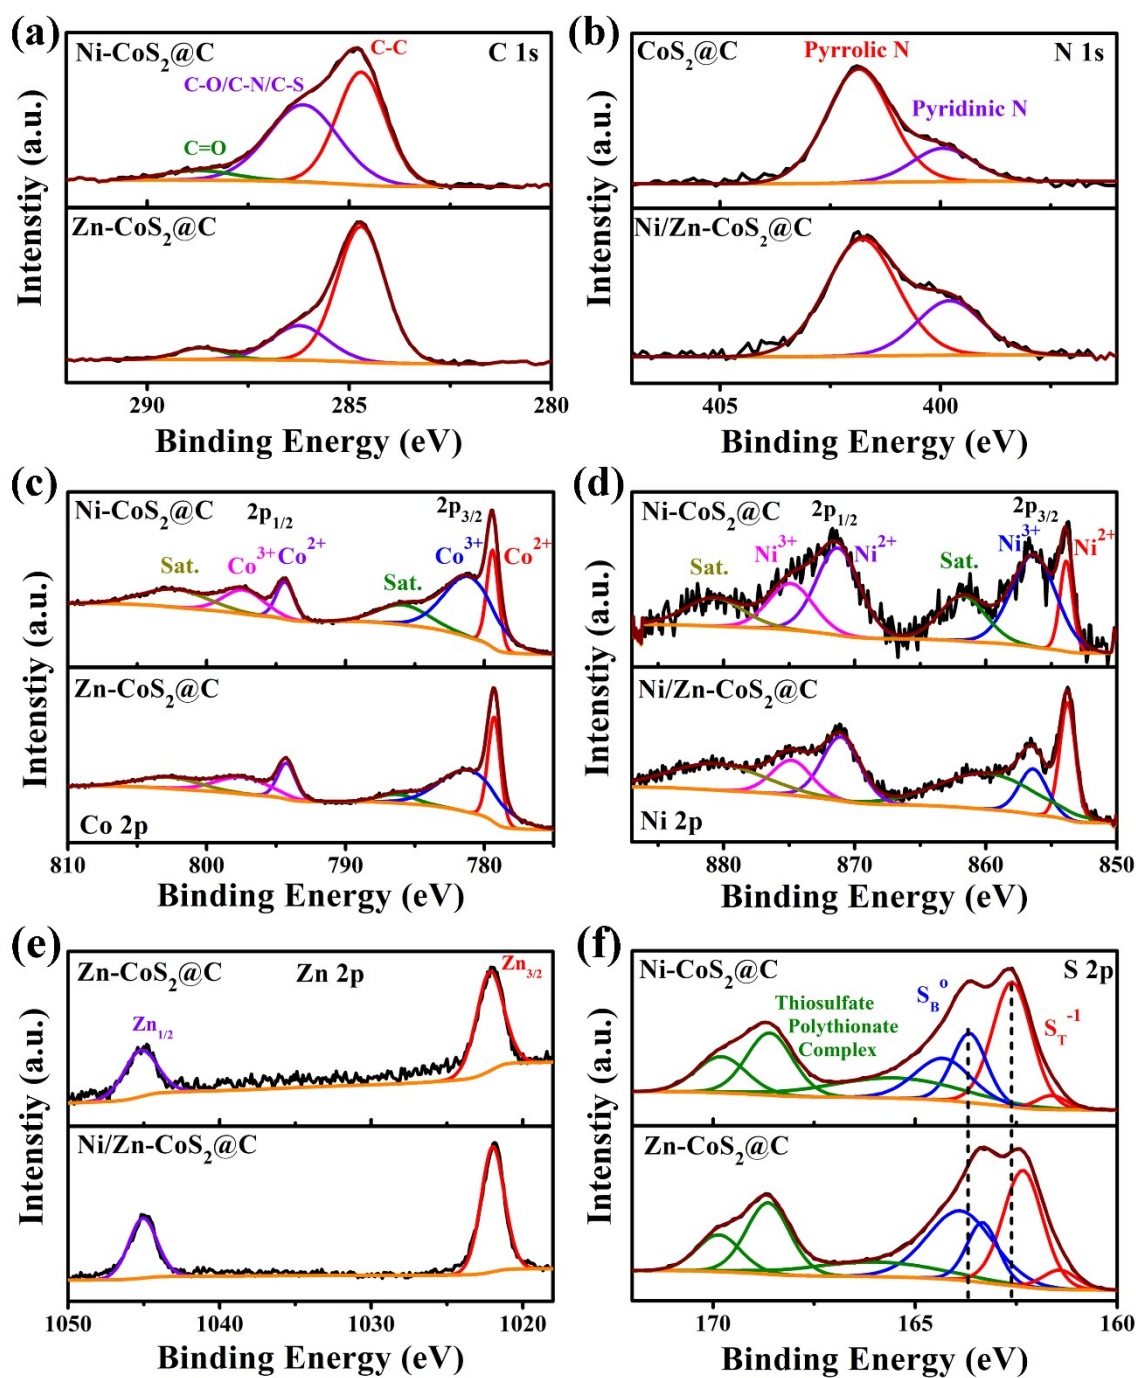

Figure S2 High-resolution XPS spectra of C 1s (a), N 1s (b), Co 2p (c), Ni 2p (d), Zn 2p (e), and S 2p (f) for CoS<sub>2</sub>@C, Ni-CoS<sub>2</sub>@C, Zn-CoS<sub>2</sub>@C, and Ni/Zn-CoS<sub>2</sub>@C spheres.

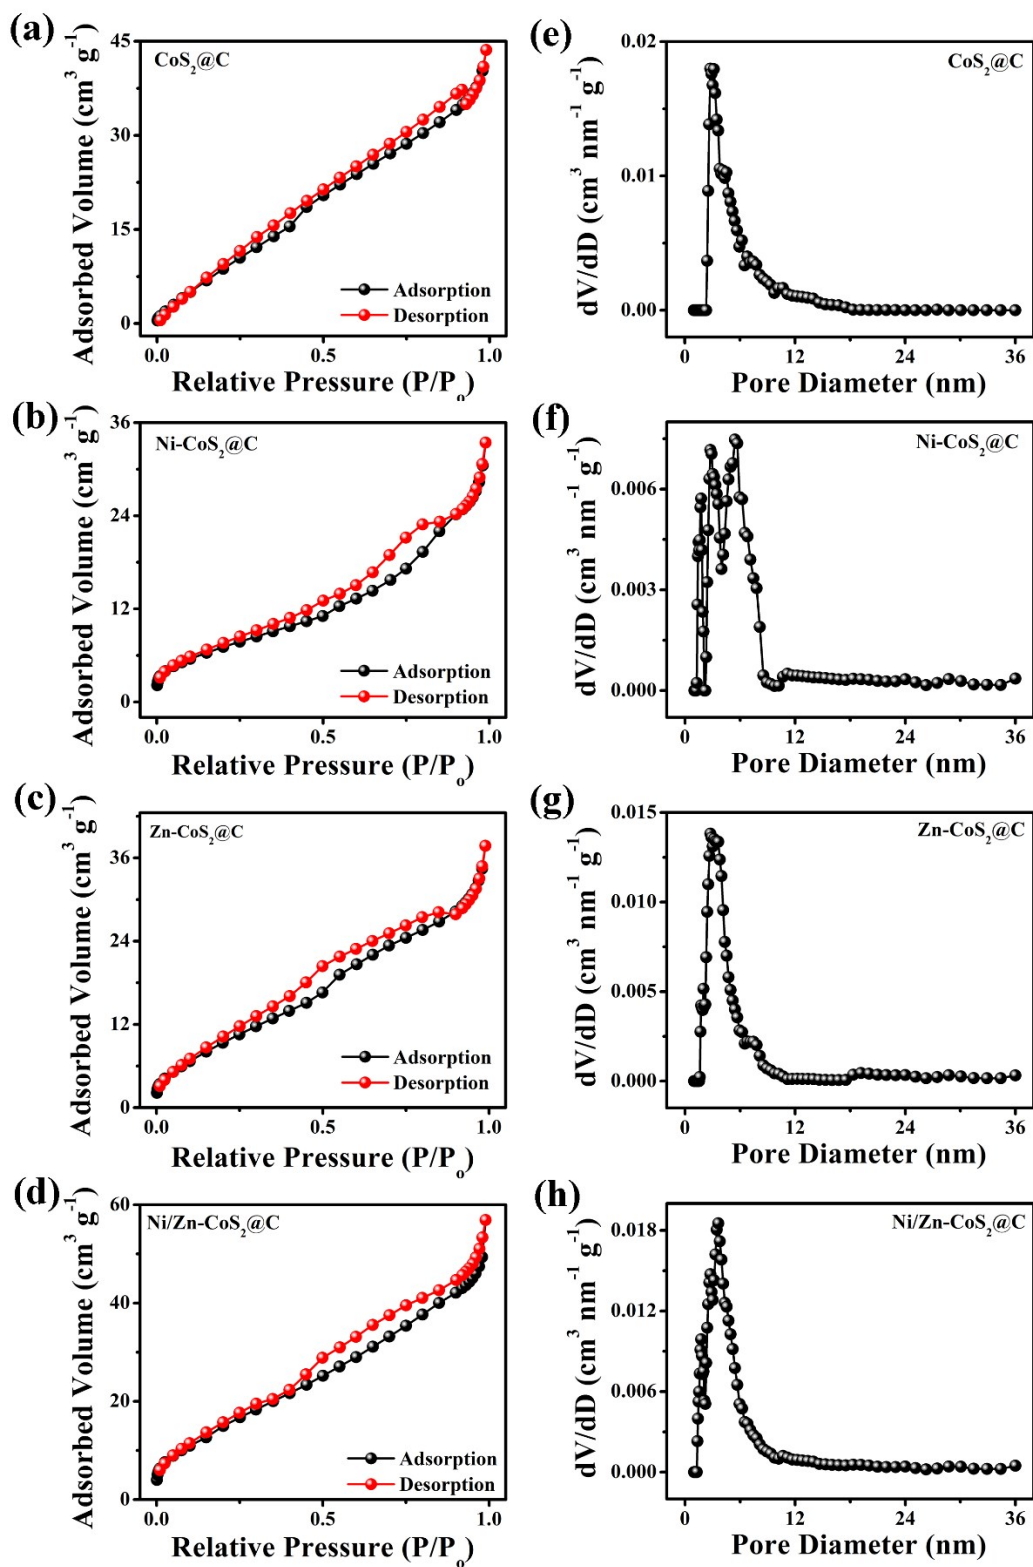

Figure S3 BET nitrogen adsorption-desorption isotherm plots (a, b, c, d) and corresponding pore size distribution (e, f, g, h) of CoS<sub>2</sub>@C, Ni-CoS<sub>2</sub>@C, Zn-CoS<sub>2</sub>@C, and Ni/Zn-CoS<sub>2</sub>@C spheres, respectively.

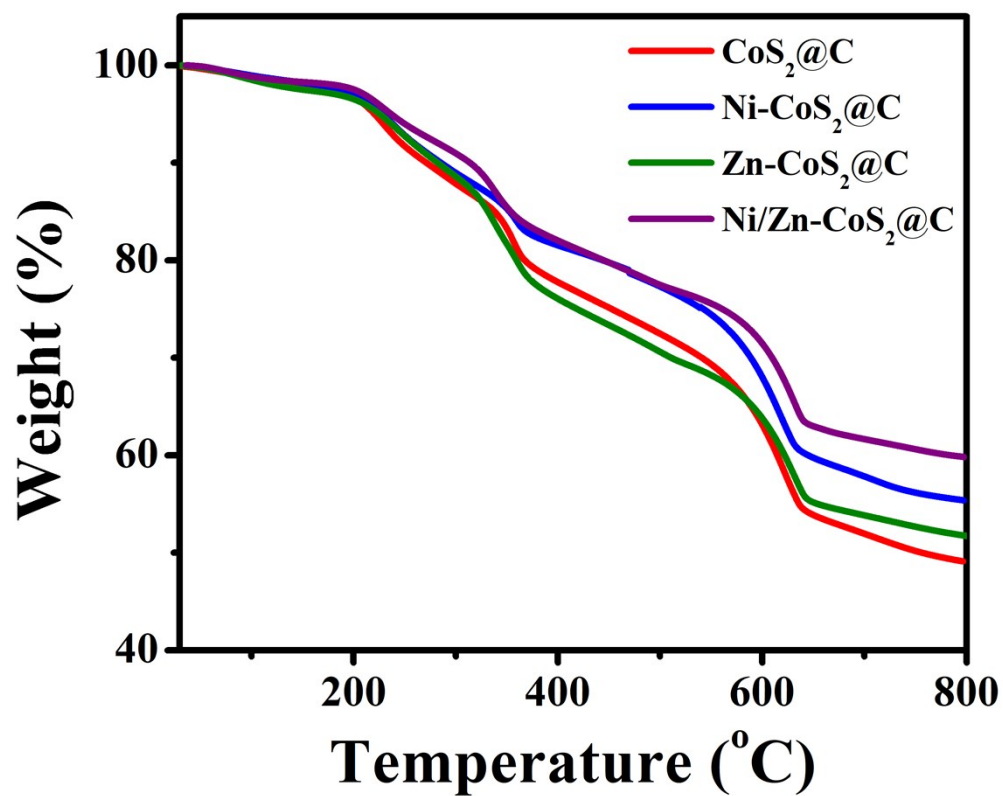

Figure S4 TGA analysis: TGA plot of percentage weight loss with rise in temperature, for CoS<sub>2</sub>@C, Ni-CoS<sub>2</sub>@C, Zn-CoS<sub>2</sub>@C, and Ni/Zn-CoS<sub>2</sub>@C spheres.



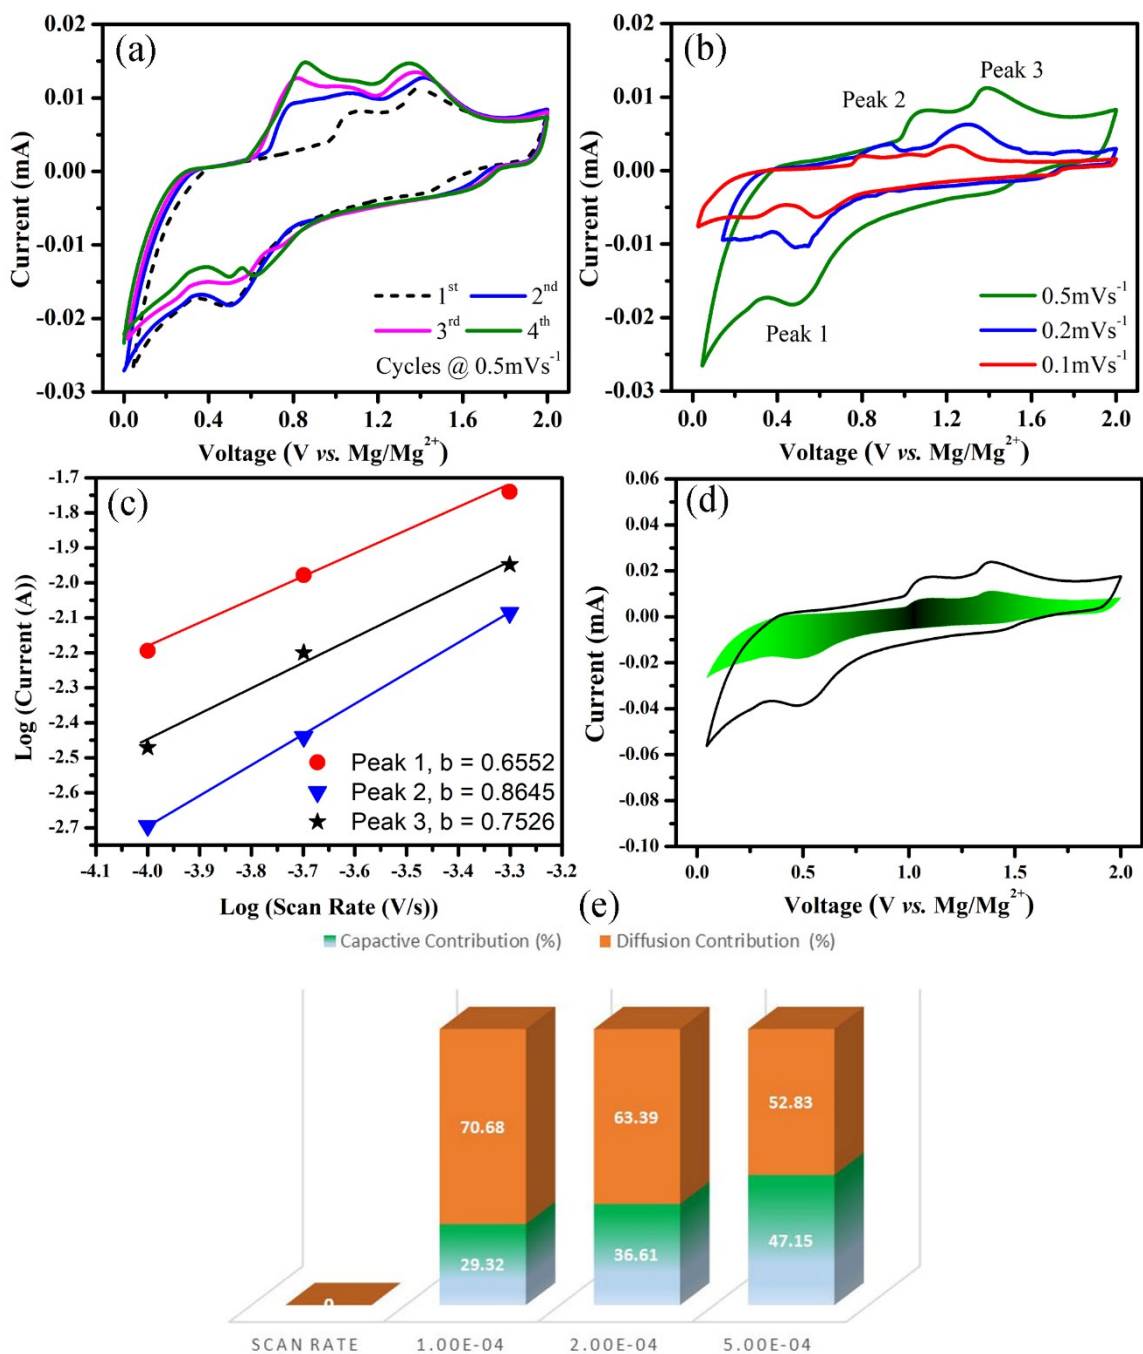

(d) at 0.5mV.s<sup>-1</sup>,

Figure S5 Cyclic voltammetry of Zn/Ni-CoS<sub>2</sub>@ClAPC //Mg at (a) 0.5 mVs<sup>-1</sup>, (b) 0.1, 0.2, and 0.5 mVs<sup>-1</sup>; (c) *b*-value analysis from plot of Log (current) vs. Log (Scan rate); (d) capacitive (shaded area) current contribution to total charge storage at 0.5 mV.s<sup>-1</sup>, and (e) capacitive and diffusion contribution ratios at different scan rates.

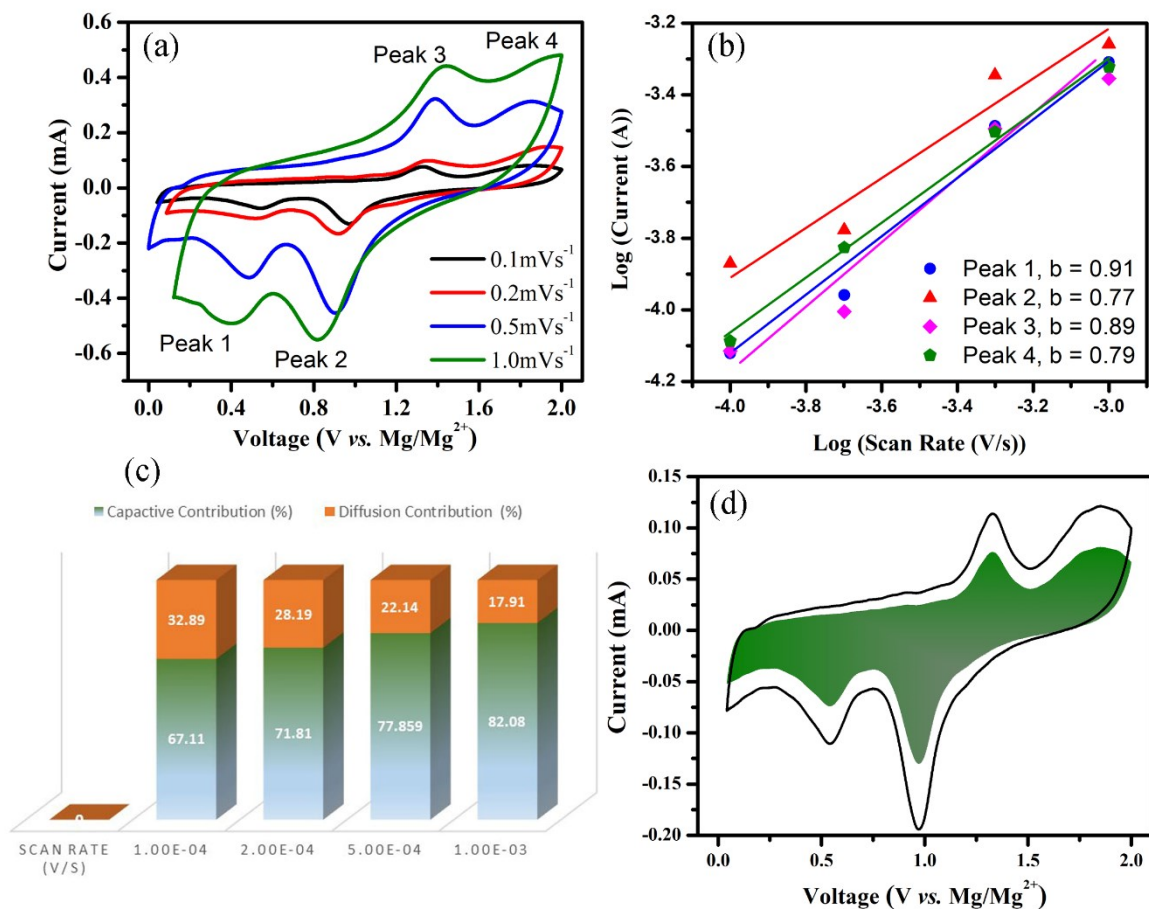

Figure S6 (a) Cyclic voltammetry of Zn/Ni-CoS<sub>2</sub>@ClAPC-LiCl|Mg hybrid cell at 0.1, 0.2, 0.5, and 1.0 mV s<sup>-1</sup>; (b) *b*-value analysis from plot of Log (current) vs. Log (Scan rate); (c) capacitive and diffusion contribution ratios at different scan rates (d) capacitive (shaded area) current contribution to total charge storage at 0.1 mV s<sup>-1</sup>.

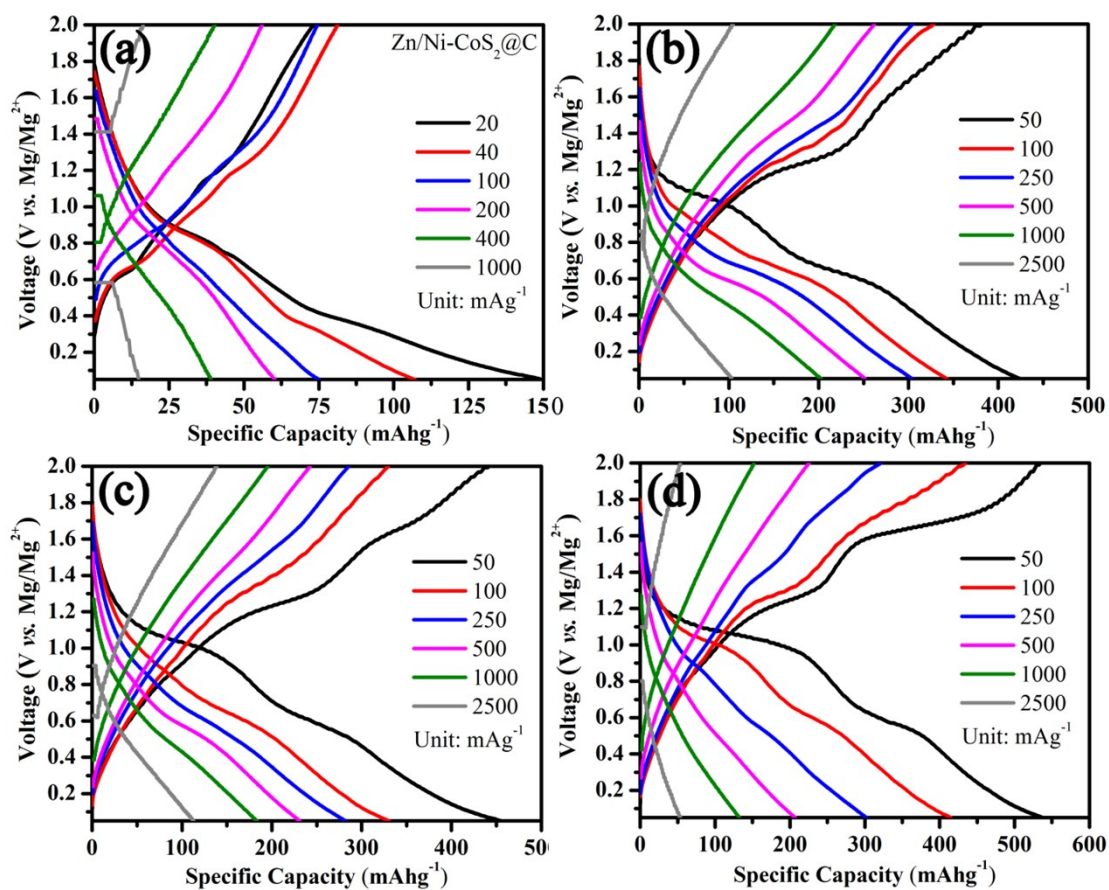

Figure S7 Galvanostatic charging-discharging profiles of (a) Zn/Ni- $\text{CoS}_2$ @C based MIB; (b)  $\text{CoS}_2$ @C, (c) Ni- $\text{CoS}_2$ @C, (d) Zn- $\text{CoS}_2$ @C based MLIB at different current densities.

Table S1 Comparison of present work (MLIBs) with conventional LIBs reported in literature.

| Cathodes                         | Maximum Capacity<br>(mA g <sup>-1</sup> ) [Current Density (mA g <sup>-1</sup> )] | Capacity Retention (%)<br>[Number of Cycles] | Reference           |
|----------------------------------|-----------------------------------------------------------------------------------|----------------------------------------------|---------------------|
| CoS <sub>2</sub> -CNTs           | 805 [100]                                                                         | 56 [50]                                      | [1]                 |
| CoS <sub>2</sub> -rGO            | 678 [100]                                                                         | 50 [100]                                     | [1]                 |
| CoS <sub>2</sub> -fCNTs          | 801 [50]                                                                          | 99 [200]                                     | [2]                 |
| CoS <sub>2</sub>                 | 498 [50]                                                                          | 20 [200]                                     | [2]                 |
| S/CoS <sub>2</sub> -NC           | 950 [100]                                                                         | 75 [250]                                     | [3]                 |
| CoS <sub>2</sub>                 | 450 [100]                                                                         | 25 [100]                                     | [4]                 |
| CoS <sub>2</sub> -CNTs           | 602 [100]                                                                         | 65 [100]                                     | [4]                 |
| CoS <sub>2</sub> -GNs            | 825 [100]                                                                         | 77 [100]                                     | [4]                 |
| CoS <sub>2</sub> @C              | 750 [500]                                                                         | 71 [200]                                     | [5]                 |
| CoS <sub>2</sub> -Carbon         | 815 [100]                                                                         | 63 [120]                                     | [6]                 |
| CoS <sub>2</sub>                 | 698 [100]                                                                         | 21 [80]                                      | [7]                 |
| Co <sub>1-x</sub> S@C@rGO        | 601 [100]                                                                         | 99 [500]                                     | [8]                 |
| MnS/Co <sub>1-x</sub> S@C        | 700 [100]                                                                         | 99 [500]                                     | [8]                 |
| C@Co <sub>9</sub> S <sub>8</sub> | 647 [200]                                                                         | 55 [50]                                      | [9]                 |
| CoS <sub>2</sub> PH              | 725 [100]                                                                         | N.A                                          | [10]                |
| CoS PH                           | 590 [100]                                                                         | N.A                                          | [10]                |
| CoS-rGO                          | 789 [62.5]                                                                        | 72 [100]                                     | [11]                |
| CoS <sub>2</sub> /CNTs/graphene  | 604 [100]                                                                         | 67 [100]                                     | [12]                |
| CoS <sub>2</sub>                 | 325 [100]                                                                         | 12 [100]                                     | [12]                |
| CoS <sub>2</sub> /RGO            | 788 [100]                                                                         | 87 [50]                                      | [13]                |
| <b>Zn/Ni-CoS<sub>2</sub>@C</b>   | <b>667 [50]</b>                                                                   | <b>73 [100]</b>                              | <b>Present Work</b> |

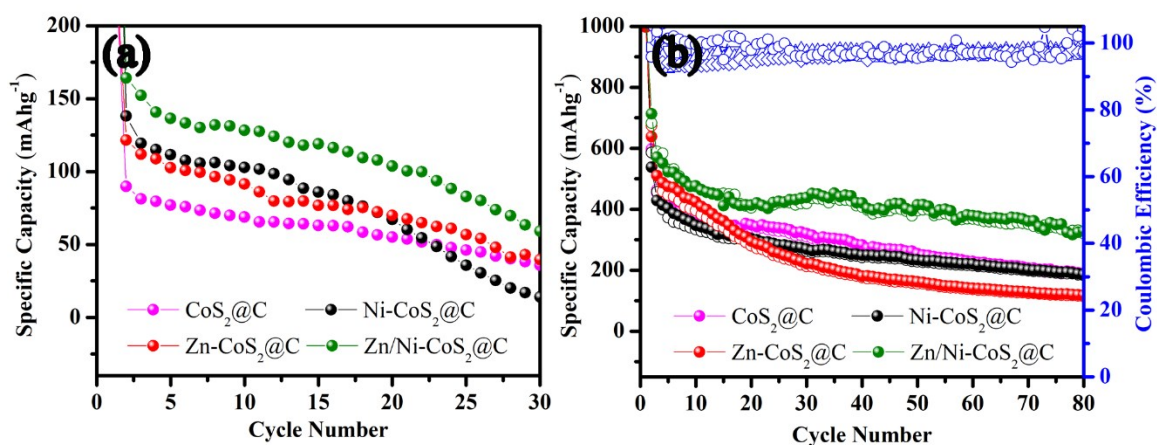

Figure S8 Cycle stabilities of (a) MIBs at 20 mA g<sup>-1</sup> and (b) MLIBs at 100 mA g<sup>-1</sup>.



Table S2 Atomic percentage of different elements in charged (2V), discharged (0.0V), and blank electrodes.

| Electrode<br>Status | Elements |       |        |        |        |
|---------------------|----------|-------|--------|--------|--------|
|                     | Co (%)   | S (%) | Zn (%) | Ni (%) | Mg (%) |
| Blank               | 3.81     | 10.08 | 0.84   | 1.01   | 0.00   |
| D 0.0V              | 2.60     | 2.83  | 0.65   | 0.70   | 5.91   |
| C 2.0V              | 3.04     | 4.80  | 0.53   | 0.79   | 1.37   |

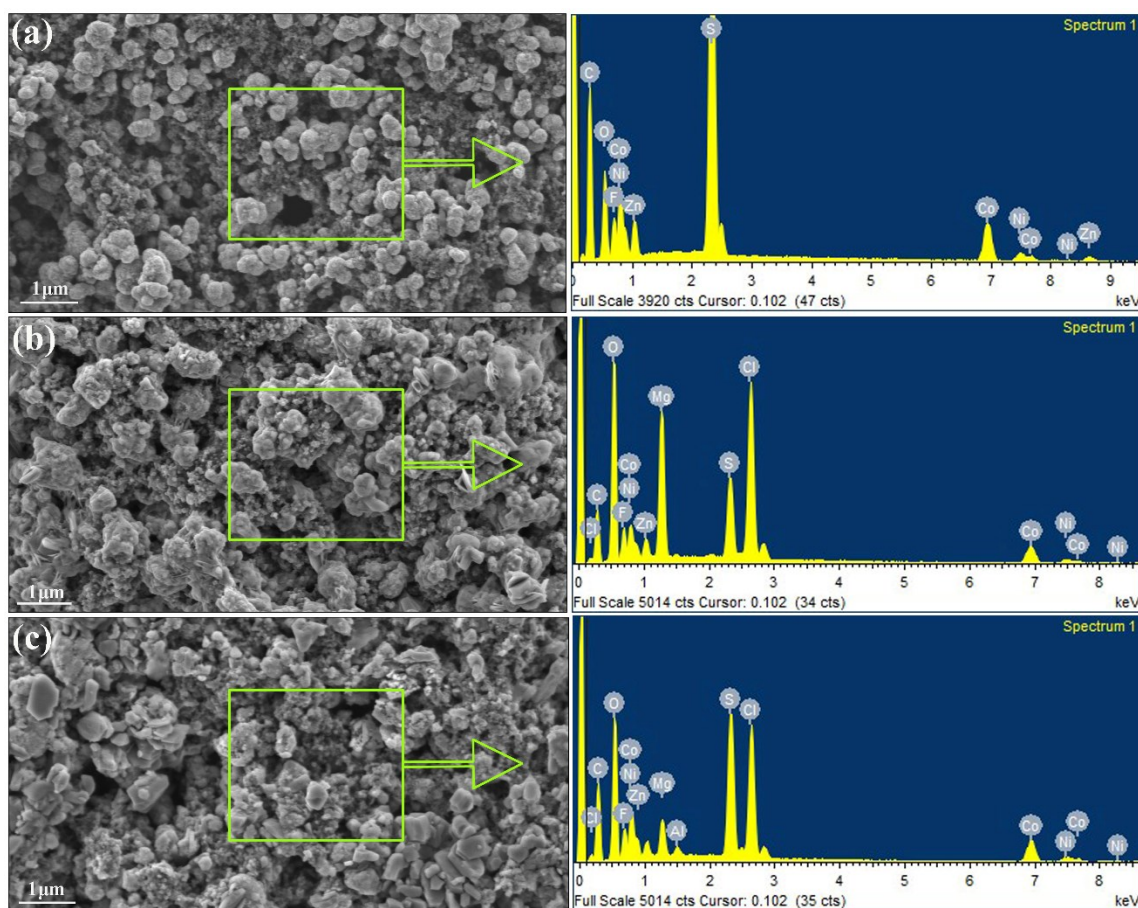

Figure S9 Surface morphology and elemental analysis of Zn/Ni-CoS<sub>2</sub>@C cathodes (a) blank, (b) discharged 0.0V, and (c) fully charged 2.0V states.

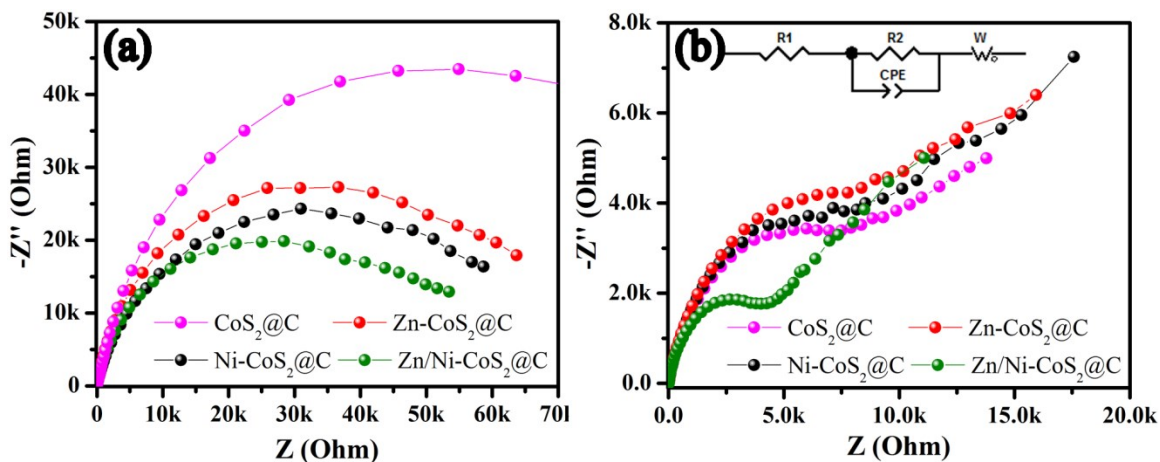

Figure S10 Electrochemical impedance curves of different electrodes at the open circuit potential (a) MIBs; and (b) MLIBs. (Inset in (b) represents the equivalent circuit).

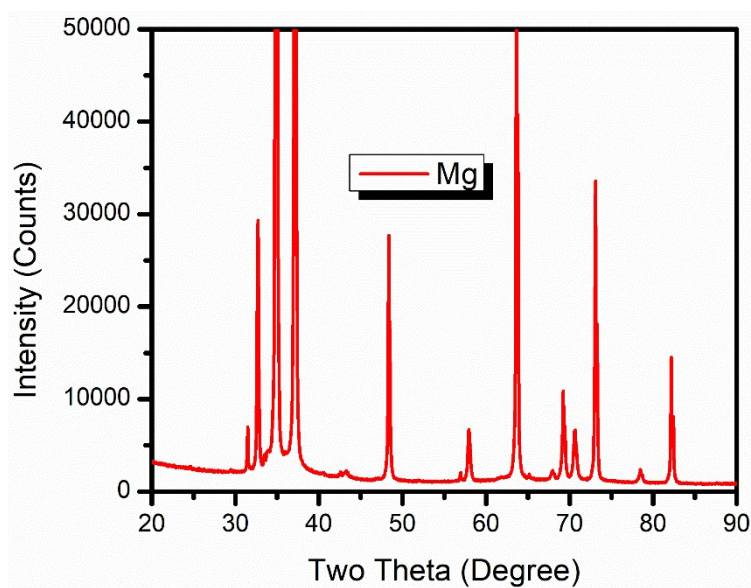

Figure S11 XRD profile of Mg anode after cycling in hybrid electrolytes.

### Calculation of Energy and Power Densities:

The power density (***P***) was calculated using Equation 1 given below.

$$P = U * I \quad (1)$$

Where ***U*** is average working voltage of battery and ***I*** is applied current. Whereas, energy density ***E*** was calculated using average working voltage (***U***), specific capacity (***C***) based on the total mass of the active materials (***m***) using Equation 2 given below.

$$E = U * C / m \quad (2)$$

### References

- [1] X. Zhu, Z. Meng, H. Ying, X. Xu, F. Xu, W. Han, Chemical Physics Letters 2017, 684, 191.
- [2] Z. X. Huang, Y. Wang, J. I. Wong, W. H. Shi, H. Y. Yang, Electrochimica Acta 2015, 167, 388.
- [3] J. Zhou, N. Lin, W. I. Cai, C. Guo, K. Zhang, J. Zhou, Y. Zhu, Y. Qian, Electrochimica Acta 2016, 218, 243.
- [4] X. Zhang, X. Jie Liu, G. Wang, H. Wang, Journal of Colloid and Interface Science 2017, 505, 23.
- [5] W. Chen, T. Li, Q. Hu, C. Li, H. Guo, Journal of Power Sources 2015, 286, 159.
- [6] Y. Zhang, N. Wang, C. Sun, Z. Lu, P. Xue, B. Tang, Z. Bai, S. Dou, Chemical Engineering Journal 2018, 332, 370.
- [7] J. M. Yan, H. Z. Huang, J. Zhang, Z. J. Liu, Y. Yang, Journal of Power Sources 2005, 146, 264.
- [8] B. Li, R. Wang, Z. Chen, D. Sun, F. Fang, R. Wu, Journal of Materials Chemistry A 2019, 7, 1260.
- [9] W. Shi, J. Zhu, X. Rui, X. Cao, C. Chen, H. Zhang, H. H. Hng, Q. Yan, ACS Applied Materials & Interfaces 2012, 4, 2999.
- [10] Y. Wang, J. Wu, Y. Tang, X. Lü, C. Yang, M. Qin, F. Huang, X. Li, X. Zhang, ACS Applied Materials & Interfaces 2012, 4, 4246.
- [11] Y. Gu, Y. Xu, Y. Wang, ACS Applied Materials & Interfaces 2013, 5, 801.
- [12] C. Xu, Y. Jing, J. He, K. Zhou, Y. Chen, Q. Li, J. Lin, W. Zhang, Journal of Alloys and Compounds 2017, 708, 1178.
- [13] B. Qiu, X. Zhao, D. Xia, Journal of Alloys and Compounds 2013, 579, 372.
